# Supplementary material for: The compound event that triggered the destructive fires of October 2017 in Portugal
Source: PubMed Central journal article supplement (PMC10006635; doi:10.1016/j.isci.2023.106141), 2023-02-04
Supplement: mmc1.pdf [file mmc1.pdf]

**iScience, Volume 26**

**Supplemental information**

**The compound event that triggered  
the destructive fires of October 2017 in Portugal**

**Alexandre M. Ramos, Ana Russo, Carlos C. DaCamara, Silvia Nunes, Pedro Sousa, P.M.M. Soares, Miguel M. Lima, Alexandra Hurduc, and Ricardo M. Trigo**

## Supplementary material

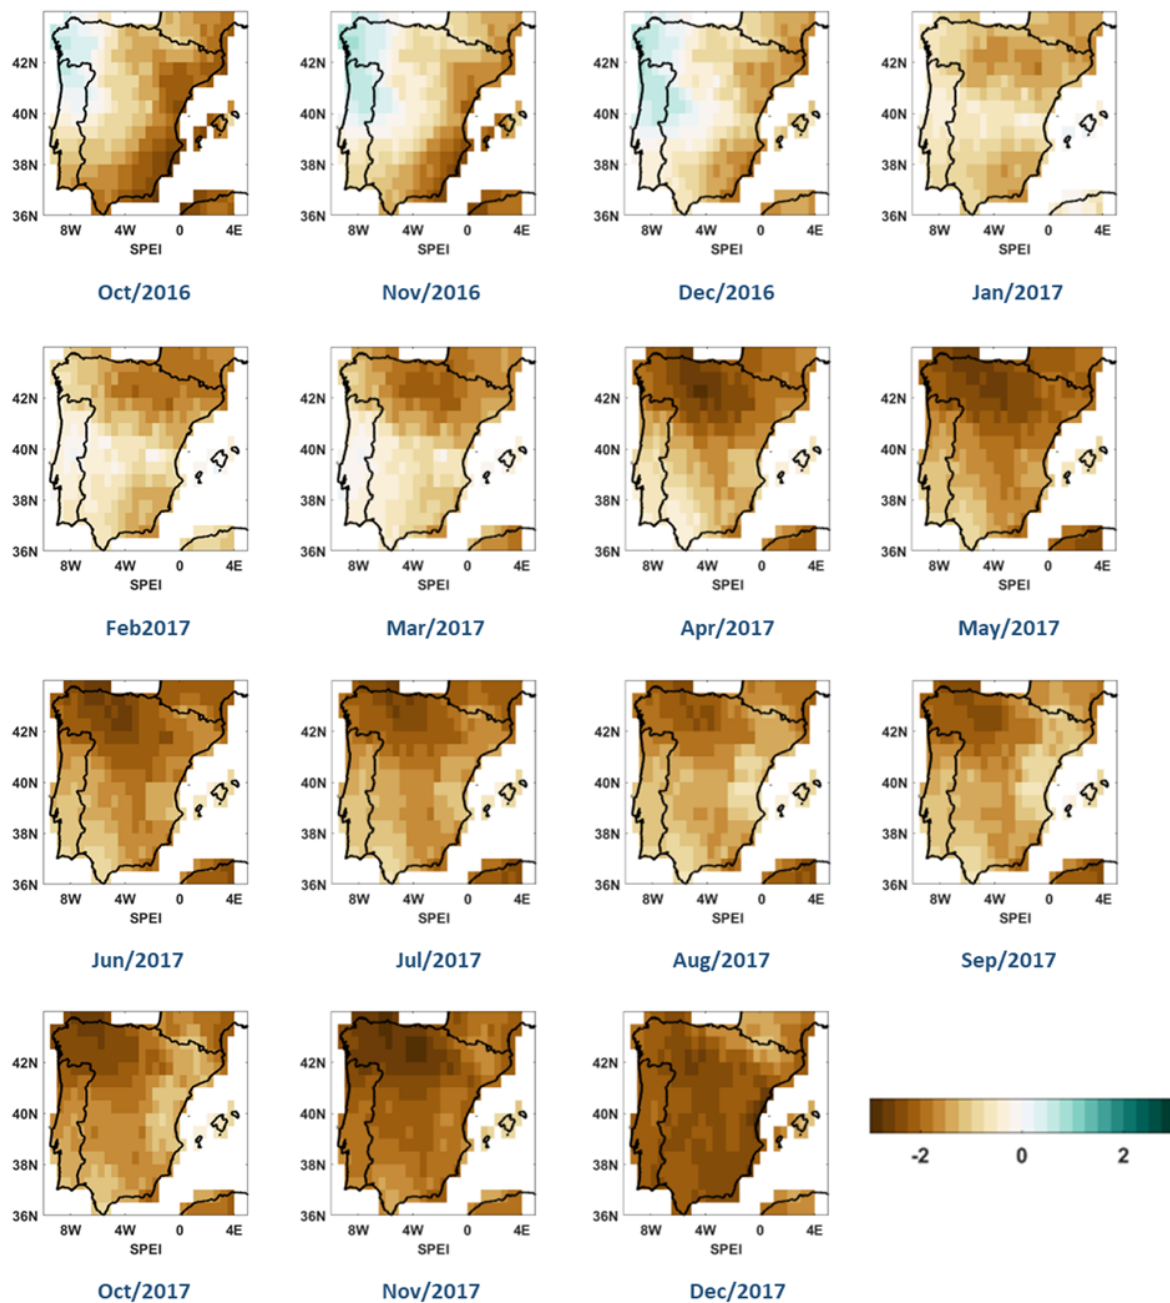

Figure S1. SPEI12 from October 2016 until December 2017 based CRUTS4.04 (1901-2019) on 0.5° resolution, Related to Figure 1.

2017-10-16 12UTC

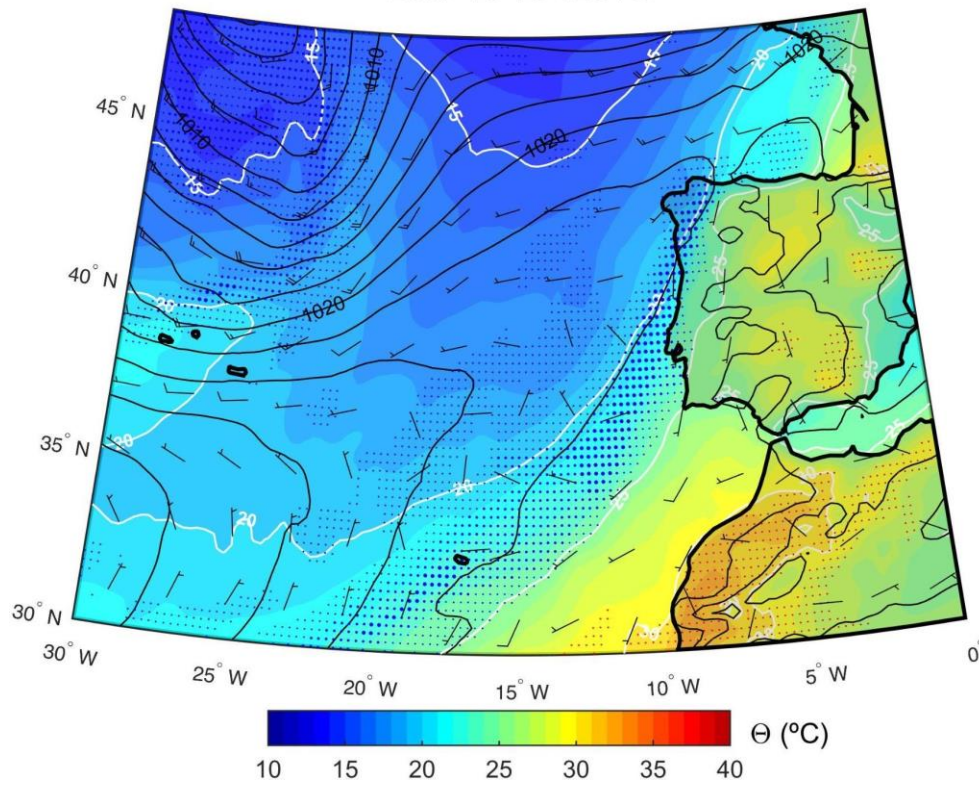

**Figure S2. Evolution of the sea level pressure (black contours), potential temperature (colored shading) and relative humidity (blue/red dots) in the lower troposphere (1000-700hPa), as well as surface wind (wind barbs) at 12 UTC 16 October 2017. The increasing size of the blue (red) dots depicts relative humidity values higher than 70%, 80% and 90% (lower than 30%, 20% and 10%), respectively, Related to Figure 5.**

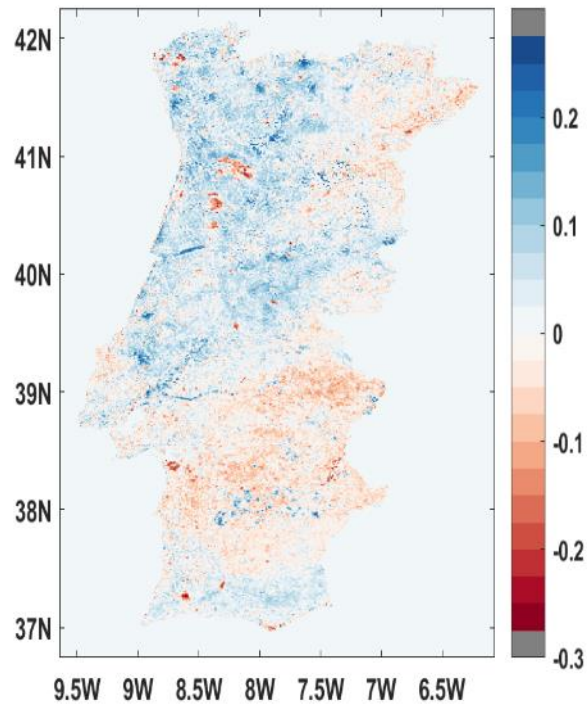

**Figure S3. NDVI anomalies for June 2017, Related to Figure 3.**

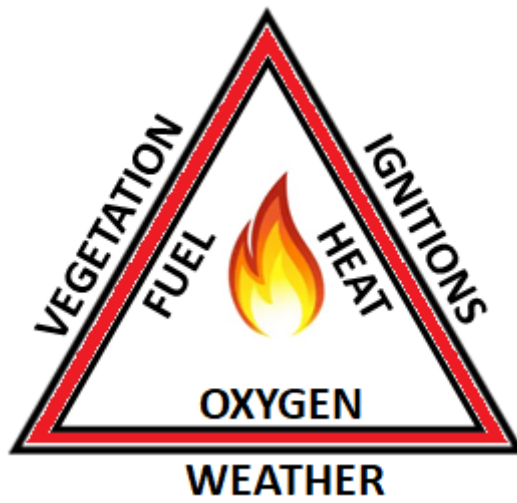

Figure S4. The fire triangle, Related to the Discussion.
